# Supplementary material for: Eco-Virological Approach for Assessing the Role of Wild Birds in the Spread of Avian Influenza H5N1 along the Central Asian Flyway
Source: PubMed Central journal article supplement (PMC3274535; doi:10.1371/journal.pone.0030636), 2012-02-07

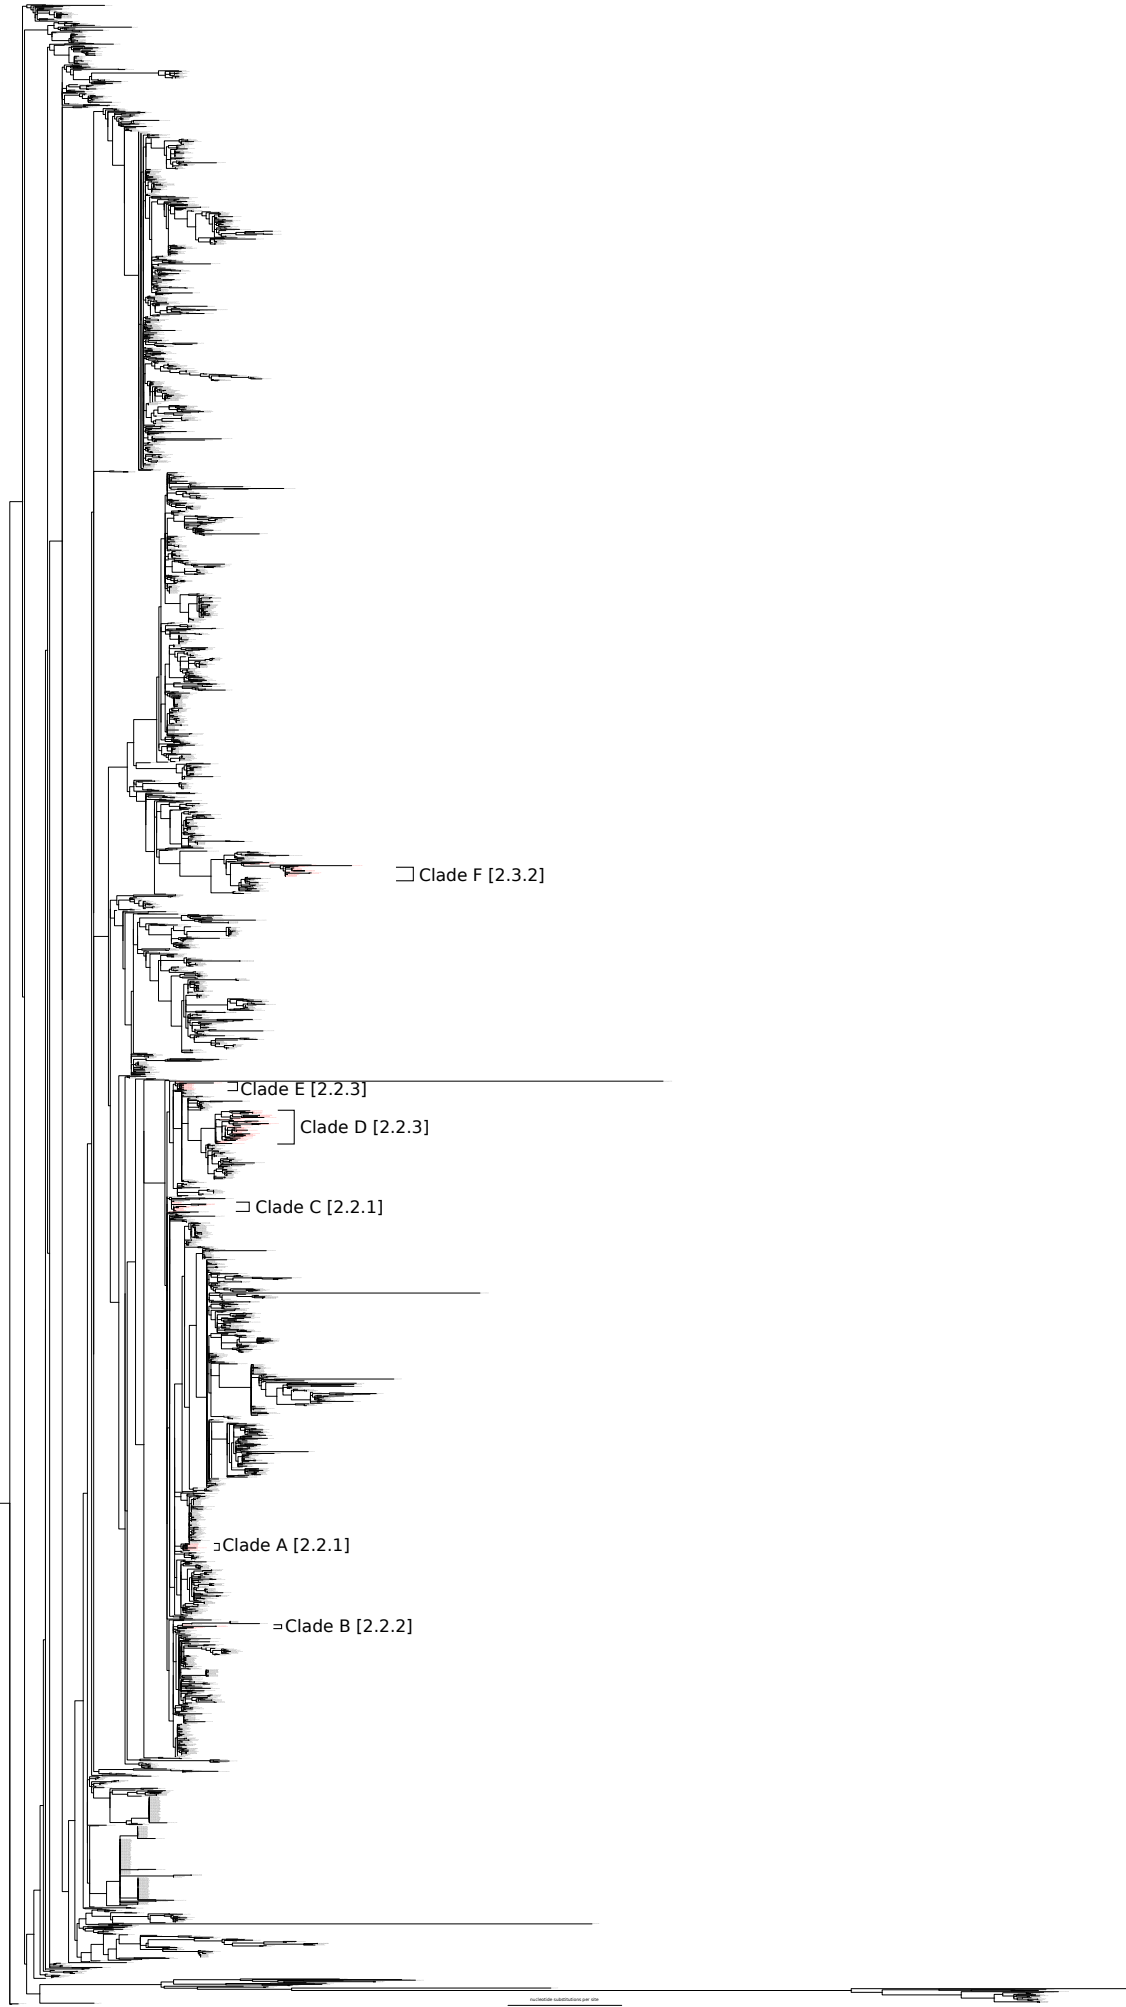

Supplement: pone.0030636.s003.pdf [file pone.0030636.s003.pdf]
